# Supplementary material for: Integrating trace amounts of Pd nanoparticles into Mo3N2 nanobelts for an improved hydrogen evolution reaction
Source: Royal Society of Chemistry journal article supplement (doi:10.1039/d1cp03898b), 2021-11-11
Supplement: d1cp03898b1.pdf [file d1cp03898b1.pdf]

### Supplementary Information

#### **Integrating Trace Amounts of Pd Nanoparticles into Mo<sub>3</sub>N<sub>2</sub> Nanobelts for Improved Hydrogen Evolution Reaction**

Saheed Abiola Raheem,<sup>ac</sup> Hanghia Shen,<sup>a</sup> Tiju Thomas<sup>\*b</sup> and Minghui Yang<sup>\*a</sup>

<sup>a</sup> Ningbo Institute of Materials Technology and Engineering, Chinese Academy of Sciences, 1219 Zhongguan West Road, Ningbo 315201, P. R. China. E-mail: [myang@nimte.ac.cn](mailto:myang@nimte.ac.cn)

<sup>b</sup> Department of Metallurgical and Materials Engineering, Indian Institute of Technology Madras, Adyar, Chennai 600036, Tamil Nadu, India

<sup>c</sup> University of Chinese Academy of Sciences, Beijing 100049, China

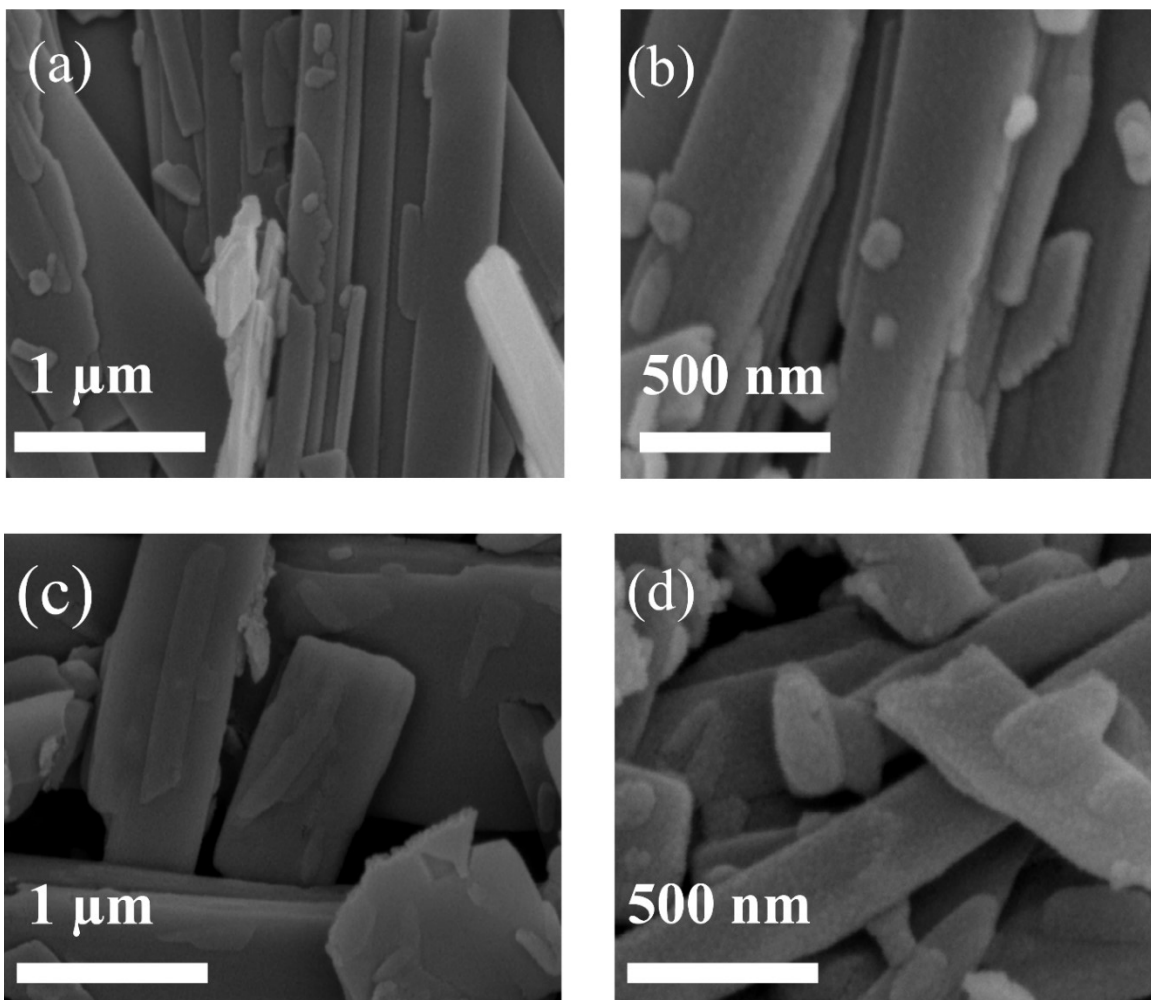

**Figure S1.** (a, b) Low resolution SEM images of Mo<sub>3</sub>N<sub>2</sub> nanobelts. (c, d) Low resolution SEM images of 1.5 wt%Pd/Mo<sub>3</sub>N<sub>2</sub> nanobelts.

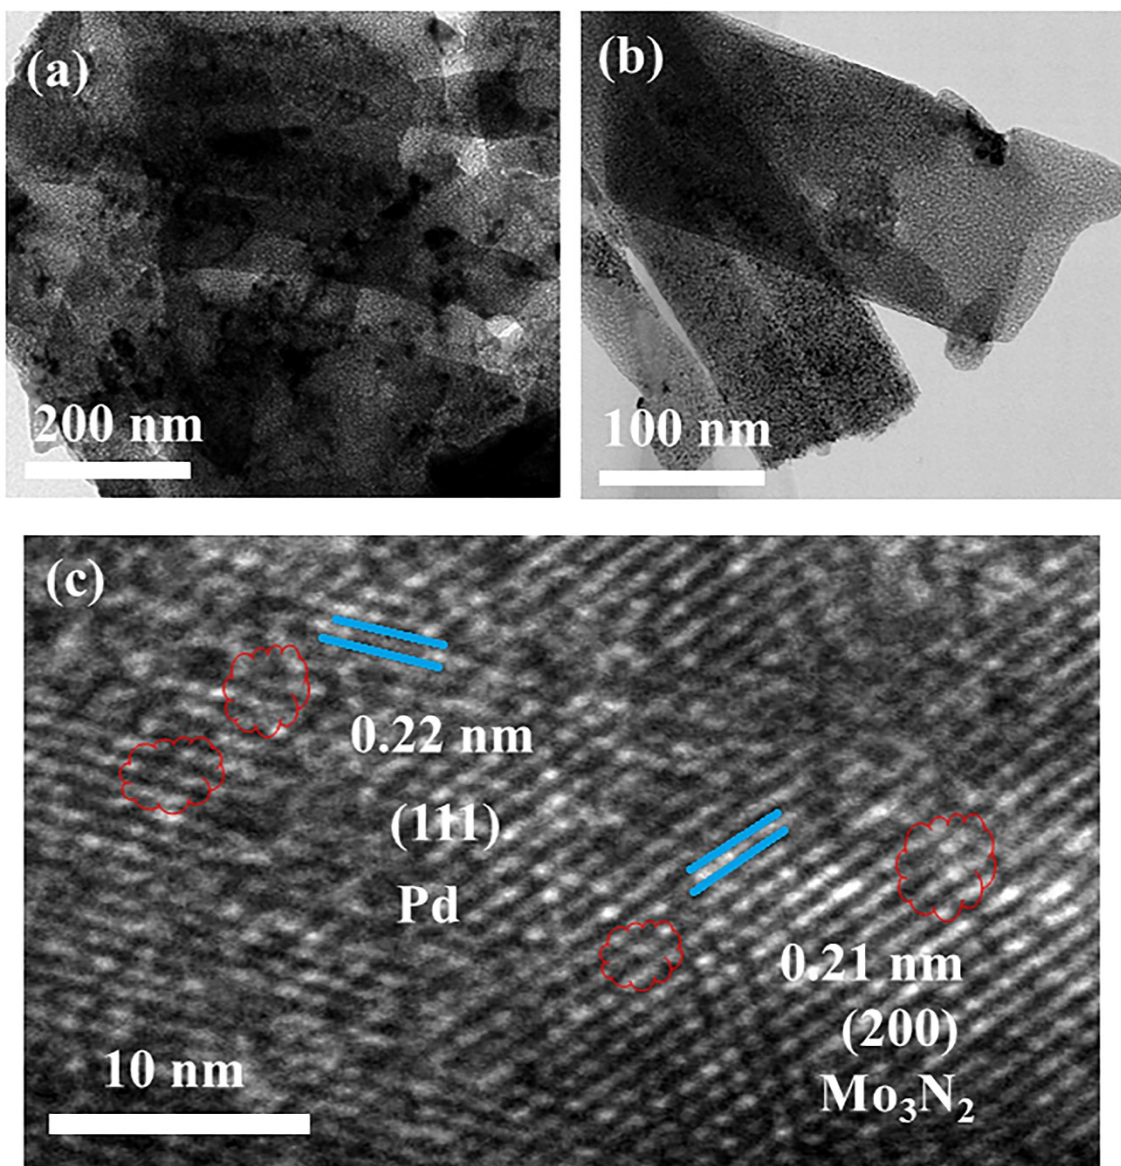

**Figure S2.** (a, b) TEM images of  $\text{Mo}_3\text{N}_2$  and 0.75 wt%Pd/ $\text{Mo}_3\text{N}_2$  nanobelts. (c) HRTEM image of 0.75 wt%Pd/ $\text{Mo}_3\text{N}_2$ .

**Table S1.** Contents of Pd in catalysts from elemental analyzer

| Element | Weight% | Atomic% |
|---------|---------|---------|
| N K     | 5.74    | 29.58   |
| Mo K    | 93.16   | 69.79   |
| Pd L    | 1.09    | 0.73    |
| Total   | 99.99   |         |

**Table S2.** Contents of Pd in catalysts from ICP-OES analysis

| Sample                                | Pd (weight %) |
|---------------------------------------|---------------|
| 0.5Pd/Mo <sub>3</sub> N <sub>2</sub>  | 0.41          |
| 0.75Pd/Mo <sub>3</sub> N <sub>2</sub> | 0.68          |
| 1.5Pd/Mo <sub>3</sub> N <sub>2</sub>  | 1.2           |

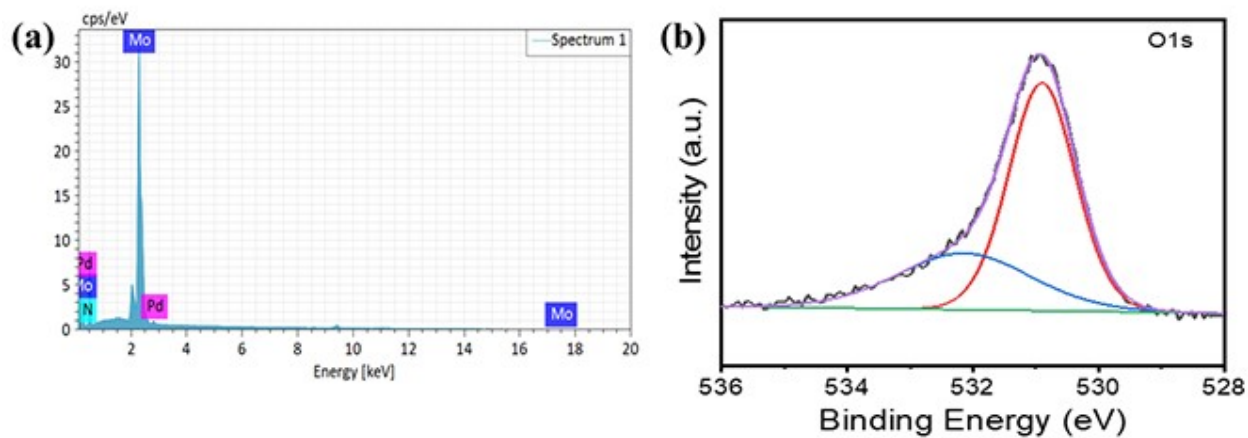

**Figure S3.** (a) EDX spectra of 0.75 wt%Pd/Mo<sub>3</sub>N<sub>2</sub>. (b) High resolution XPS spectra of O 1s.

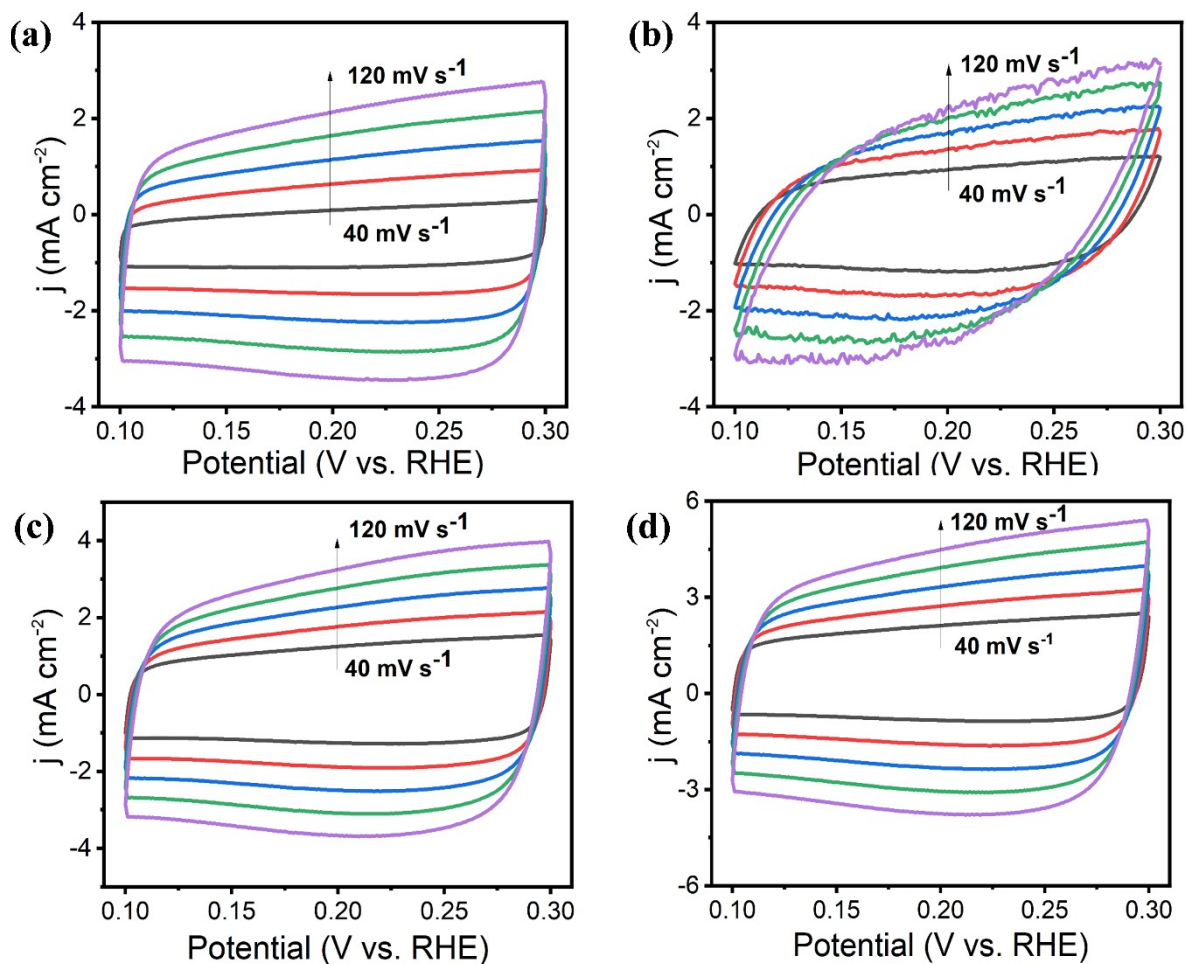

**Figure S4.** Cyclic voltammograms with a scan rate of 40, 60, 80, 100 and 120  $\text{mV s}^{-1}$  in 1 M KOH for  $\text{Mo}_3\text{N}_2$  (a), 0.5 wt%Pd/ $\text{Mo}_3\text{N}_2$  (b), 0.75 wt%Pd/ $\text{Mo}_3\text{N}_2$  (c), and 1.5 wt%Pd/ $\text{Mo}_3\text{N}_2$  (d).

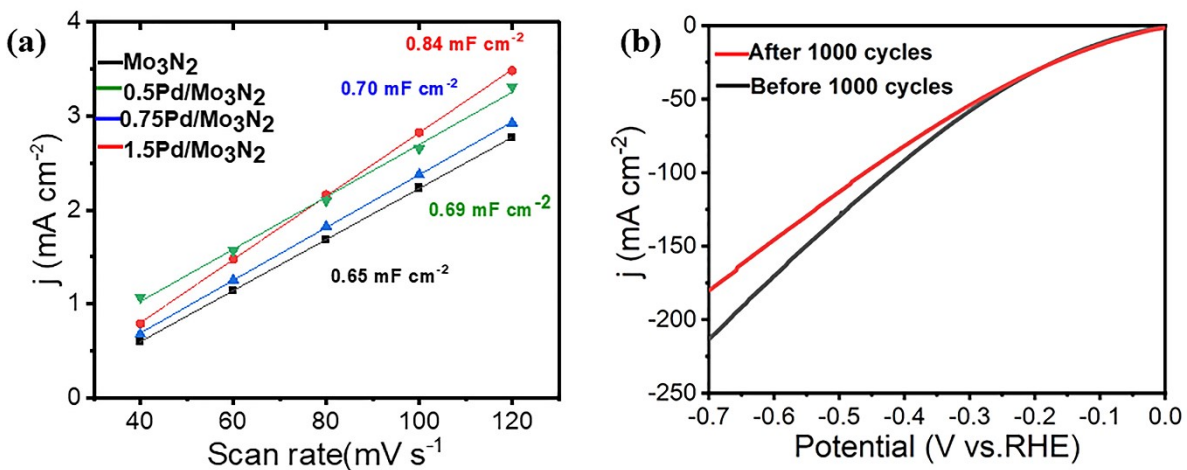

**Figure S5.** (a) Capacitive current as a function scan rate for Mo<sub>3</sub>N<sub>2</sub>, 0.5 wt%Pd/Mo<sub>3</sub>N<sub>2</sub>, 0.75 wt%Pd/Mo<sub>3</sub>N<sub>2</sub>, and 1.5 wt%Pd/Mo<sub>3</sub>N<sub>2</sub> electrocatalysts. (b) LSV curves before and after durability test.

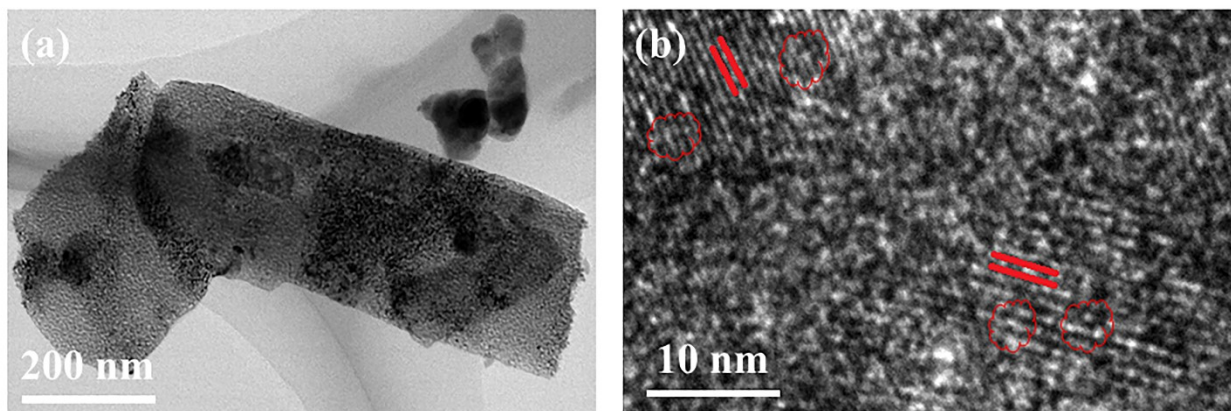

**Figure S6.** TEM and HRTEM images of 0.75 wt%Pd/Mo<sub>3</sub>N<sub>2</sub> after the stability test.

**Table S3.** Comparison of HER performance of 0.75Pd/Mo<sub>3</sub>N<sub>2</sub> with other Pd-based electrocatalysts in electrolyte.

| Catalysts                             | Pd<br>(mg) | Electrolyte                          | Mass loading<br>(mg cm <sup>-2</sup> ) | Overpotential at 10<br>mA cm <sup>-2</sup> (mV) | Tafel slope<br>(mV dec <sup>-1</sup> ) | Ref.      |
|---------------------------------------|------------|--------------------------------------|----------------------------------------|-------------------------------------------------|----------------------------------------|-----------|
| PdCuRu                                | 7.6        | 0.1 M KOH                            | 0.2                                    | 31                                              | 52                                     | 1         |
| Pd/G/ZnO/NF                           | 0.29       | 1 M KOH                              | -                                      | 31                                              | 46.5                                   | 2         |
| Pd-Pt                                 | 17.4       | 1 M KOH                              | 0.02                                   | 71                                              | 31                                     | 3         |
| Pd-g-C <sub>3</sub> N <sub>4</sub>    | 14.9       | 0.5 H <sub>2</sub> SO <sub>4</sub>   | 0.04                                   | 55                                              | 35                                     | 4         |
| Mn <sub>3</sub> N <sub>2</sub> /PdO   | 18         | 0.5 M H <sub>2</sub> SO <sub>4</sub> | 0.24                                   | 44.6                                            | 49.6                                   | 5         |
| Pd@CoFe<br>/NCNT                      | 13.85      | 1 M KOH                              | 0.27                                   | 214                                             | 120                                    | 6         |
| PdSn                                  | 63.6       | 1 M H <sub>2</sub> SO <sub>4</sub>   | 2.75                                   | 68                                              | 204                                    | 7         |
| C-PdPt                                | 4.06       | 0.5 M H <sub>2</sub> SO <sub>4</sub> | 0.26                                   | 26                                              | 33                                     | 8         |
| 0.75Pd/Mo <sub>3</sub> N <sub>2</sub> | 7.9        | 0.5 M H <sub>2</sub> SO <sub>4</sub> | 0.2                                    | 41                                              | 88                                     | This work |
| 0.75Pd/Mo <sub>3</sub> N <sub>2</sub> | 7.9        | 1 M KOH                              | 0.2                                    | 65                                              | 70                                     | This work |

## Reference

- 1 M. Li, M. Luo, Z. Xia, Y. Yang, Y. Huang, D. Wu, Y. Sun, C. Li, Y. Chao, W. Yang, W. Yang, Y. Yu and S. Guo, *J. Mater. Chem. A*, 2019, **7**, 20151-20157. <https://doi.org/10.1039/C9TA06861A>
- 2 N. Wang, B. Tao, F. Miao and Y. Zang, *RSC Adv.*, 2019, **9**, 33814-33822. <https://doi.org/10.1039/C9RA05335B>
- 3 J. Fan, K. Qi, L. Zhang, H. Zhang, S. Yu and X. Cui, *ACS Appl. Mater. Interfaces* 2017, **9**, 21, 18008–18014. <https://doi.org/10.1021/acsami.7b05290>
- 4 T. Bhowmik, M. K. Kundu and S. Barman, *ACS Catal.*, 2016, **3**, 1929–1941. <https://doi.org/10.1021/acscatal.5b02485>
- 5 K. C. Majhi and M. Yadav, *J. Alloy. Compd.*, 2021, **855**, 157511. <https://doi.org/10.1016/j.jallcom.2020.157511>
- 6 R. Manjunatha, L. Dong, Z. Zhai, J. Wang, Q. Fu, W. Yan and J. Zhang, *Green Energy Environ.*, 2020, 2468-0257. <https://doi.org/10.1016/j.gee.2020.12.0055>
- 7 A. Kumar and S. Deka, *Appl. Catal. A*, 2020, **599**, 117575. <https://doi.org/10.1016/j.apcata.2020.117575>
- 8 B. T. Jebaslinhepzybai, N. Prabu and M. Sasidharan, *Int. J. of Hydrogen Energy*, 2020, **45**, 11127-11137. <https://doi.org/10.1016/j.ijhydene.2020.02.059>
